# Supplementary material for: Challenges and Pitfalls in the Engineering of Human Interleukin 22 (hIL-22) Secreting Lactobacillus reuteri
Source: PubMed Central journal article supplement (PMC7289926; doi:10.3389/fbioe.2020.00543), 2020-06-05
Supplement: Data_Sheet_1.pdf [file Data_Sheet_1.pdf]

## SUPPLEMENTARY FIGURES

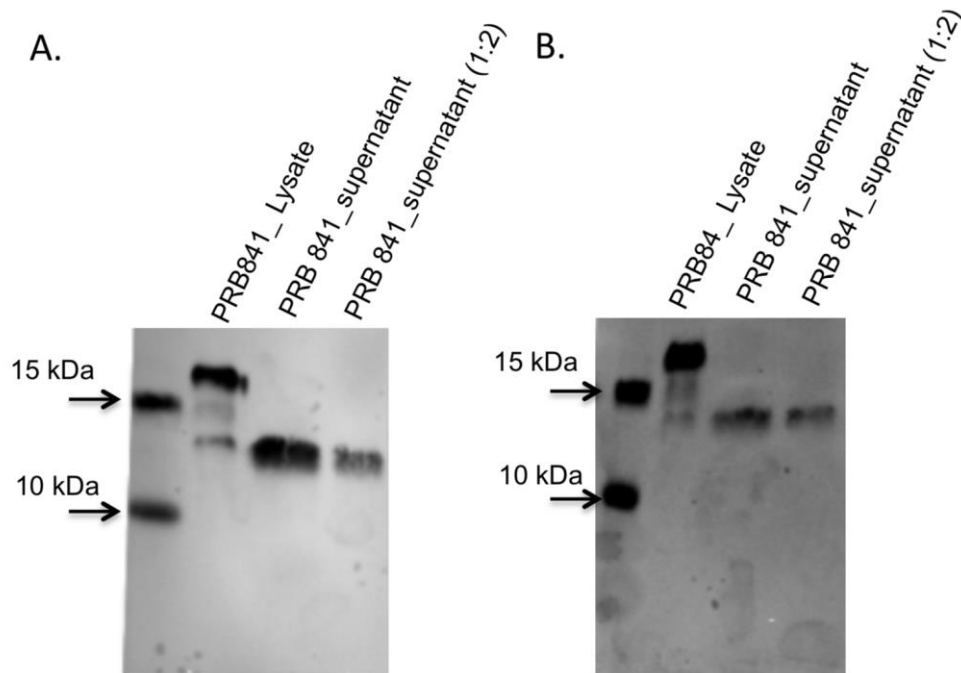

**Supplementary Figure 1. *L. reuteri* does not cleave secreted Elafin.** Western blots of the expression of Elafin in supernatants or cell lysates of recombinant *L. reuteri* (PRB 841), detected with a monoclonal antibody (A) or a polyclonal antibody (B) both diluted (1:2) or undiluted.

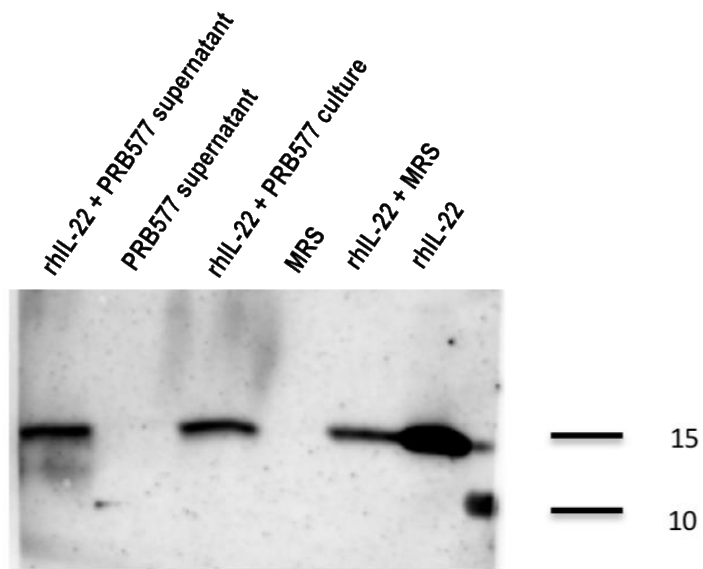

**Supplementary Figure 2. Incubation of commercial rhIL-22 with bacterial supernatants does not cause cleavage of protein.** Western blot of commercial hIL-22 incubated with bacterial supernatant, culture, and bacterial media shows no cleavage of IL22 suggesting cleavage of IL-22 was not directly caused by an extracellular protease.

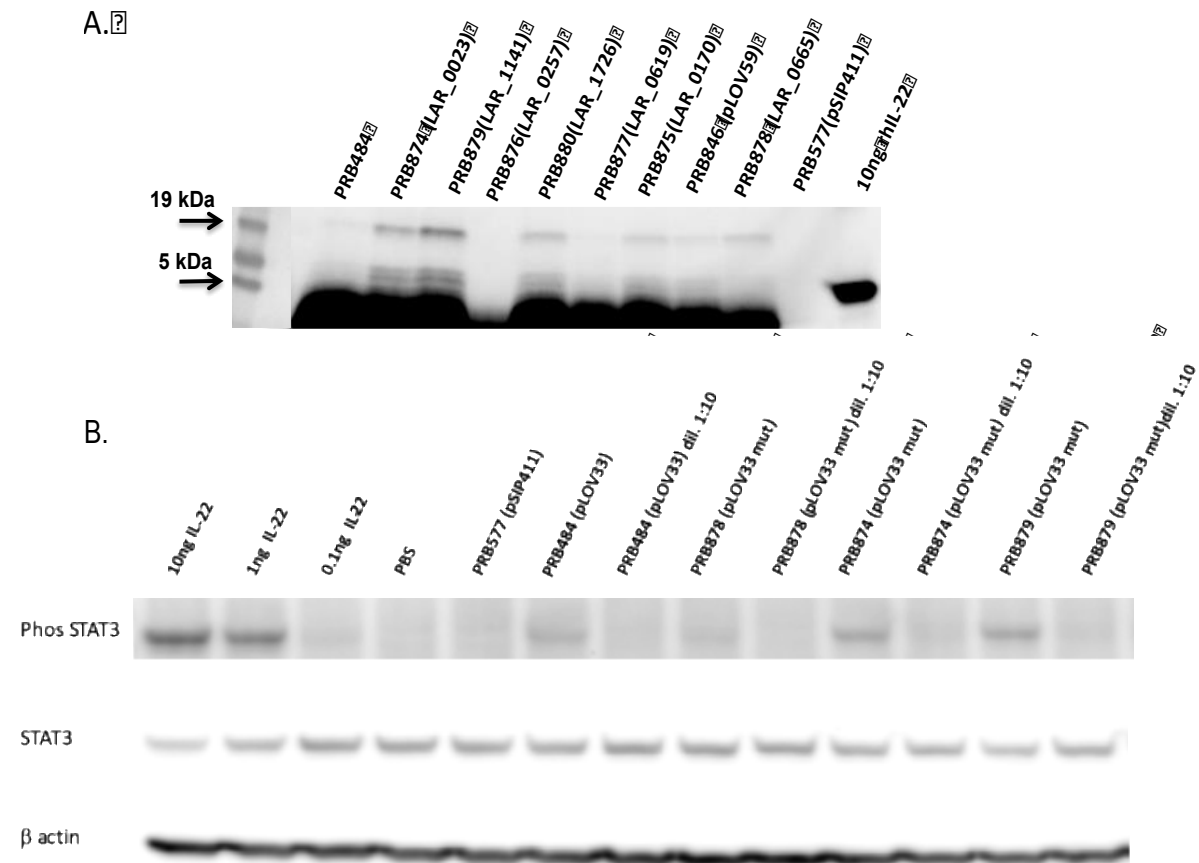

**Supplementary Figure 3. Mutations of proteases improve processing of hIL-22 in PRB484.**

(A). Western blot of hIL-22 on supernatants of PRB484 or null mutants of predicted proteases that were screened for high production of hIL-22. The null mutants expressed hIL-22 from pLOV33. PRB577 was used as negative control and commercial hIL-22 as positive control (rhIL-22). (B) Biological activity of hIL-22 secreted by PRB484 or null mutants of proteases: PRB874, PRB878, PRB879. pSTAT3 expression from HT29 cells incubated with rhIL-22 or *L. reuteri* supernatants was measured by western blot. PBS and PRB577 were used as negative control. Supernatants loaded as undiluted or diluted (1:10). STAT3 and  $\beta$ -actin were used as internal controls.

A.

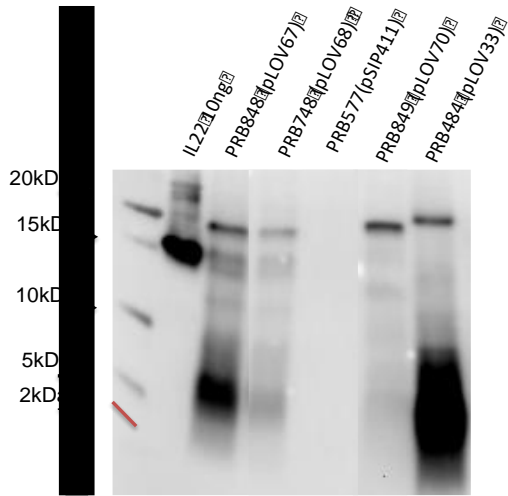

B.

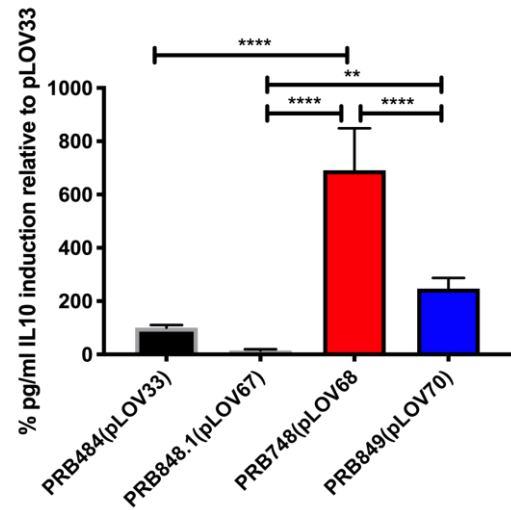

**Supplementary Figure 4. Mutation of first proline in the N terminus of hIL-22 improves bioactivity of secreted protein.** A. Western blot showing expression of hIL-22 in which either one proline (PRB748) or both N terminus prolines (PRB848) were mutated. An *L. reuteri* strain expressing a pro-peptide at the N term (PRB849) was also evaluated. B. IL10 ELISA showing biological activity of bacterially secreted hIL-22 from proline mutated strains on Colo205 cell cultures.

**Supplementary Table 1. Additional strains created in this work.**

| <b>Strain</b>  | <b>Description</b>                                                       | <b>Source</b> |
|----------------|--------------------------------------------------------------------------|---------------|
| PRB841         | <i>L. reuteri</i> harboring pLOV02 for inducible expression of Elafin    | This work     |
| PRB848         | <i>L. reuteri</i> harboring pLOV67 (double N terminal proline mutations) | This work     |
| PRB748         | <i>L. reuteri</i> harboring pLOV68 (single N terminal proline mutation)  | This work     |
| PRB849         | <i>L. reuteri</i> harboring pLOV70 (pro-peptide added to N-term)         | This work     |
| PRB874         | <i>L. reuteri</i> with null mutant of protease harboring pLOV33          | This work     |
| PRB875         | <i>L. reuteri</i> with null mutant of protease harboring pLOV33          | This work     |
| PRB876         | <i>L. reuteri</i> with null mutant of protease harboring pLOV33          | This work     |
| PRB877         | <i>L. reuteri</i> with null mutant of protease harboring pLOV33          | This work     |
| PRB878         | <i>L. reuteri</i> with null mutant of protease harboring pLOV33          | This work     |
| PRB879         | <i>L. reuteri</i> with null mutant of protease harboring pLOV33          | This work     |
| PRB880         | <i>L. reuteri</i> with null mutant of protease harboring pLOV33          | This work     |
| <b>Plasmid</b> | <b>Description</b>                                                       | <b>Source</b> |
| pLOV67         | pLS103 with double N terminal proline mutations (P2G, P17G)              | This work     |
| pLOV68         | pLS103 with single N terminal proline mutation (P2G)                     | This work     |
| pLOV70         | pLOV33 with pro-peptide added to N-term                                  | This work     |

**Supplementary Table 2. Oligonucleotides and synthetic DNA fragments used in this study**

| Oligonucleotide name, or DNA block | Sequence (5'-3')                                     | Target                                              |
|------------------------------------|------------------------------------------------------|-----------------------------------------------------|
| <b>For PCR</b>                     |                                                      |                                                     |
| <b>oLC_201</b>                     | agcagcccatggtatcgaagaataatcgaaaggaac                 | Fwd, 5'-end (signal peptide LAR_0089) from gLOV_001 |
| <b>oLC_689</b>                     | ggtaccgaattcctatcagatacatgcgtt                       | Rev, 3' -end (hIL-22) from gLOV_001                 |
| <b>pLS_102_2</b>                   | ggagatttagccatggagaagaaaattatttcagctattttaat         | Fwd, 5'-end gLS103, Lp_3050 signal peptide          |
| <b>pLS103_5</b>                    | gtgaactaattggagcagcagctgaagcttgag                    | Rev, 3' -end gLS103, Lp_3050 signal peptide         |
| <b>pLS_103_3</b>                   | tcaagcttcagctgctgctccaattagttcacattgt                | Fwd, 5'-end, hIL-22 in pLOV33                       |
| <b>pLS_103_6</b>                   | cgaaccgggggtaccgaattcctatcagatacatgcgt               | Rev, 3'-end, hIL-22 in pLOV33                       |
| <b>pLS_103_1</b>                   | attaaatttctccatggctaaaatctccttgaatagtattttatagaataca | Rev, 3' pSIP411 backbone                            |
| <b>pLS_103_4</b>                   | gtatctgataggaattcggtagcccggttcg                      | Fwd, 5' pSIP411 backbone                            |
| <b>pLS_107_1</b>                   | cgcattgtatctgataatgggtactgcaggcat                    | Fwd, 5' pNZ411 backbone                             |
| <b>pLS_107_2</b>                   | taaggaggcactcaccatggagaagaaaattatttcagct             | Fwd, 5'-end gLS103, usp_45 signal peptide           |
| <b>pLS_107_4</b>                   | taattttcttccatggtagtgccctcctataa                     | Rev, 3' pNZ411 backbone                             |

|                               |                                                                                              |                                              |
|-------------------------------|----------------------------------------------------------------------------------------------|----------------------------------------------|
| <b>pLS_107_7</b>              | atgcctgcagtagccattatcagatacatgcgtccg                                                         | Rev 3' -end gLS103,<br>usp_45 signal peptide |
| <b>oLC_201</b>                | agcagcccatggtatcgaagaataatcgaaggaac                                                          | Fwd, 5' LAR_0089<br>signal peptide           |
| <b>oLC_211</b>                | tcgttggttcttctgtattagcagaagcattcatccc                                                        | Rev, 3' LAR_0089<br>signal peptide           |
| <b>oLC_217</b>                | gcttctgctaatacagtaacagcgtcccggttaa                                                           | Fwd, 5'-end, Elafin in<br>pLOV02             |
| <b>oLC_213</b>                | cagcagcgaattctaaagtccaaccggcgaga                                                             | Rev, 3'-end, Elafin in<br>pLOV02             |
| <b>For Recombineering</b>     |                                                                                              |                                              |
| <b>oJP_577</b>                | tcaaaccaccaggaccaagcgtgaaagacgacgctTCTGCttaattcacct<br>aatgggttggttgatccatgaactgg            | <i>rpoB L. reuteri</i>                       |
| <b>oLC_370</b>                | taacactaacaacggctccttgacggacttataagctgggAATTCAgctt<br>ccccgttaagtccgcttattcttattaacctctg     | LAR_0023, <i>L. reuteri</i><br>F275          |
| <b>oLC_691</b>                | tggtcgcccgtgcttgaaccctgcatcgttgaataaaCTTatcctccacctac<br>taaaagcctattataaatccgctt            | predicted protease<br>LAR_0170               |
| <b>oLC_528</b>                | ggaaacggtcttcttctgtgaggtattgccccaaaAGCTTtagtaggc<br>gattcccataatacacaagaacatcacggcatagaa     | predicted protease<br>LAR_0257               |
| <b>oLC_540</b>                | tgccgtcccggacttctgatataggaatttagggccagaaAGCTTtagcag<br>cctagtaaaaggacaagccctaaataattctattcg  | LAR_0619                                     |
| <b>oLC_531</b>                | ttttggaccattcctattgaaattcacgaaccagaattcGCTAGcgttagc<br>aaaataataatgacctattcatgaacaaggacaa    | LAR_0665                                     |
| <b>oLC_539</b>                | taagtccgccttattcttattaacctctgtaccaccagactGGGCTagccagct<br>gggactcgtgtacttcttctctcatgatgtg    | LAR_1141                                     |
| <b>oLC_690</b>                | aataatttgtaattgaagccaccggaagagccttatctacTCAAAGcttatag<br>ataattgccccgttgaagcatcagccatgatcgct | LAR_1726                                     |
| <b>DNA Synthetic fragment</b> |                                                                                              |                                              |

|                 |                                                                                                                                                                                                                                                                                                                                                                                                                                                                                                                                                                                                                                                                                    |                                                                                                              |
|-----------------|------------------------------------------------------------------------------------------------------------------------------------------------------------------------------------------------------------------------------------------------------------------------------------------------------------------------------------------------------------------------------------------------------------------------------------------------------------------------------------------------------------------------------------------------------------------------------------------------------------------------------------------------------------------------------------|--------------------------------------------------------------------------------------------------------------|
| <b>gLOV_001</b> | <p>Agatnttagccatggtatcgaagaataatcgaaaggaacaattccggaacaaga<br/> gcccgaagcaacggtttgcaataaaaagctcactgtcggagttgcttcagtcct<br/> tattggtttacattcatgggatgaatgcttctgtaatacagcccaattagttcac<br/> attgtagactcgataagtcacaactccaacagccttacatcactaaccgcacattca<br/> tgcttgctaaagaagcaagcttgccgataataacacagacgtacgactgattggt<br/> gaaaagtatttcacggagtgagcatgtctgagaggtgtatctgatgaagcaagt<br/> cttaattcactttggaagaggtgctcttccacagtctgatcggtccaaccttacat<br/> gcaggaagttgtccctttctggctcggttatccaatcgtaagtacctgccatatt<br/> gaggagatgacctcacatccaagaaacgtacagaagctcaagacactgtc<br/> aagaaactggcgcaatccggggagatcaaggctattggcgagttagactactttt<br/> tatgtcattacggaacgcattgatctgataggaattcgggtacccc</p> | <p>Template for SP:hIL-22</p>                                                                                |
| <b>gLS103</b>   | <p>attacaaggagatttagccatggagaaatttaattttaaaactatgttattattagtttt<br/> agcttcatgtgttttgggtgtgtgtaattgttactacttcattaggtccacaaactgct<br/> attactgctcaagcttcagctgctgctccaattagttcacattg</p>                                                                                                                                                                                                                                                                                                                                                                                                                                                                                             | <p>Lp_3050 signal peptide<br/> from <i>L. plantarum</i>,<br/> codon optimized for <i>L.<br/> reuteri</i></p> |
| <b>gLS102</b>   | <p>attacaaggagatttagccatggagaagaaaattatttcagctattttaatgtcaact<br/> gttattttatcagctgcagctccattatcaggtgtttatgctgctgcagctccaattagt<br/> tcacattg</p>                                                                                                                                                                                                                                                                                                                                                                                                                                                                                                                                  | <p><i>usp45 L. lactis B1:D34</i></p>                                                                         |
